# Supplementary material for: Tumor Growth Ameliorates Cardiac Dysfunction
Source: MDPI journal article supplement (doi:10.3390/cells12141853), 2023-07-14
Supplement: s1 [file s1]

## Supplementary material

### Supplemental Figures:

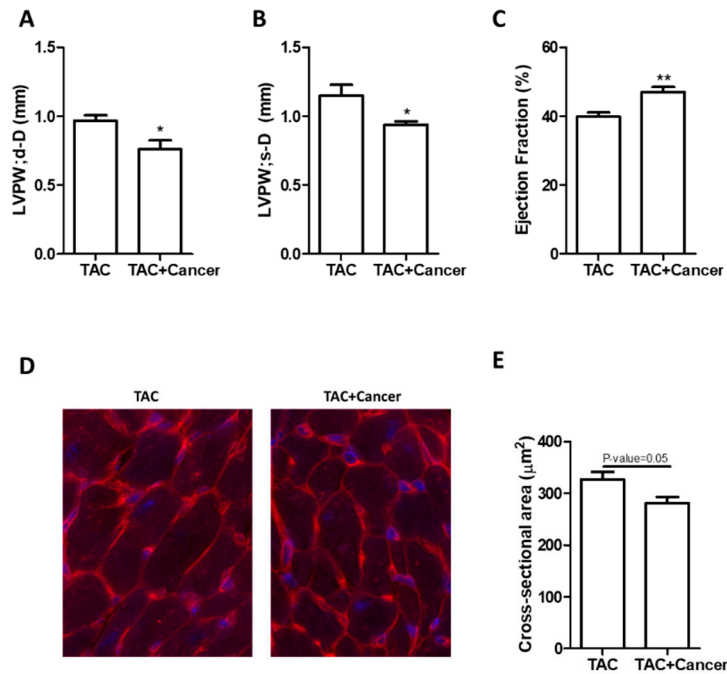

### Supplemental Figure S1: Echocardiography parameters and cell size analysis.

**A** Left ventricular posterior wall thickness in diastole (mm). **B** Left ventricular posterior wall thickness in systole (mm). **C** Left ventricular ejection fraction (%). **D** Female mice were either injected with PyMT cancer cells or left untreated. Five days after, all mice underwent TAC surgery for 3 weeks and hearts were analyzed. Ventricles sections were stained with FETC-labeled wheat germ agglutinin and cell size was analyzed. Scale bar=50μm. **E**. Quantification of cell size from D represented as cross sectional area in μm<sup>2</sup>. Results are presented as mean presented as mean ± SEM, student-t test. \*  $P < 0.05$ , \*\* $P < 0.01$ .



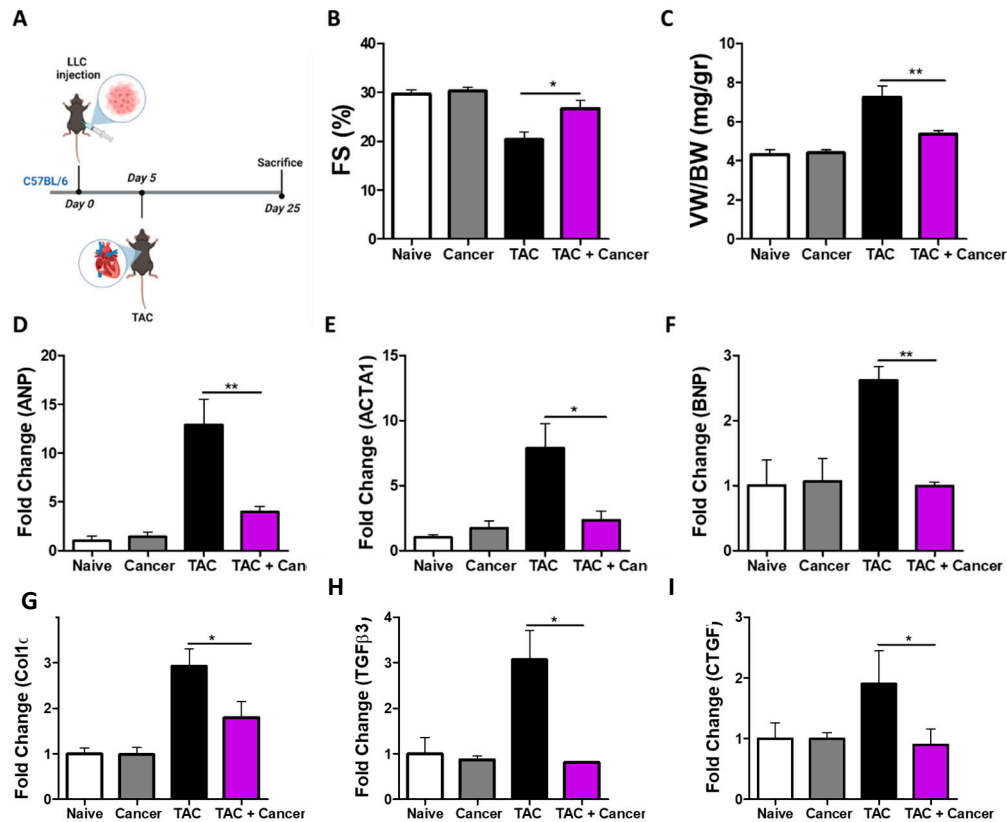

**Supplemental Figure S2: LLC Tumor growth improves cardiac dysfunction following TAC in male mice.**

**A.** Schematic diagram of the experimental timeline. The 4 experimental groups included are naïve mice, LLC-injected mice, TAC-operated either LL-bearing or non-bearing mice. **B.** Fractional shortening (FS) of the experimental cohorts, calculated from echocardiography data, at day 25. Calculated based on parameters in Supp. Table 5. **C.** Ventricular weight/body weight ratio (VW/BW) of the experimental cohorts at day 25. **D-I.** The mRNA levels of hypertrophic markers ANP and BNP and ACTA1 (D-F) and fibrosis markers collagen, TGFβ3, and CTGF (G-I) in the hearts of the experimental cohorts at day 25, measured using qRT-PCR, normalized to the GAPDH housekeeping gene. The results are presented as mean ± SEM, student-t test. \*  $P < 0.05$ , \*\* $P < 0.01$ . ( $n = 5$  in all groups).



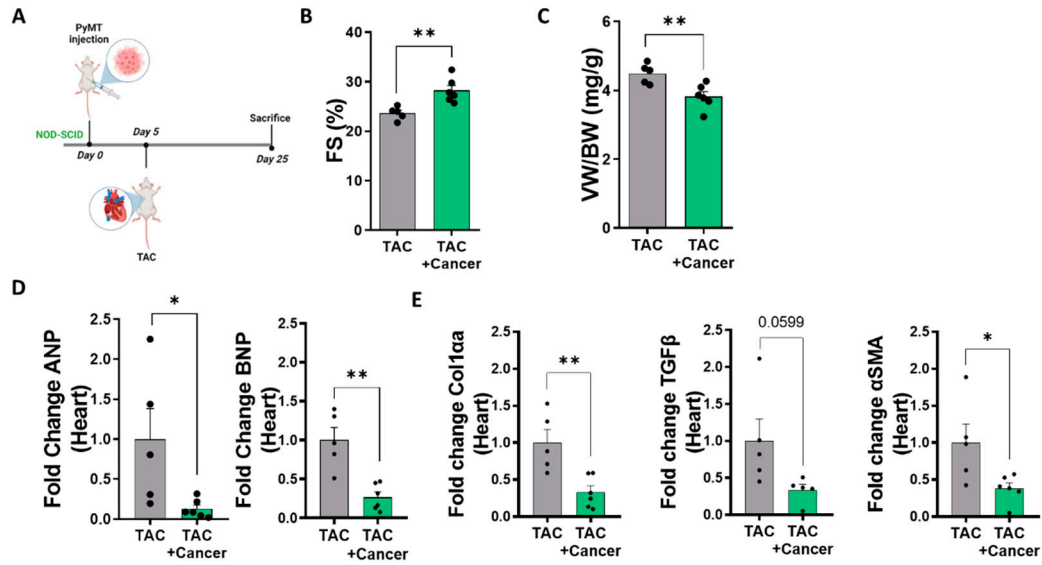

**Supplemental Figure S3: Tumor growth's beneficial effect in NOD-SCID mice.**

**A.** Schematic diagram of the experimental timeline. **B.** Fractional shortening (FS) of TAC-operated PyMT-bearing and non-cancer bearing mice, calculated from echocardiography data. Calculated based on parameters in Supp. Table 6. **C.** The ventricular weight/body weight ratio (VW/BW) of TAC-operated PyMT-bearing and non-cancer bearing mice. **D-E.** The mRNA levels of hypertrophic markers ANP and BNP (D) and fibrosis markers collagen, TGFβ3 and αSMA (E) in the hearts of TAC-operated PyMT-bearing and non-cancer bearing mice, measured using qRT-PCR, normalized to the GAPDH housekeeping gene. The results are presented as mean ± SEM, student-t test. \*  $P < 0.05$ , \*\* $P < 0.01$ . In B-E, each dot represents one mouse. ( $n=5$  in all groups).



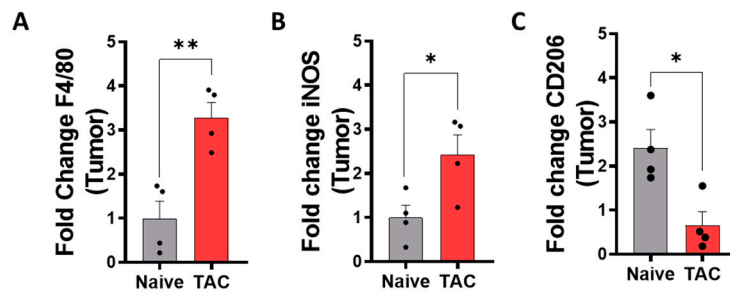

**Supplemental Figure S4: M1 macrophage polarization in the tumor of TAC-operated mice.**

**A-C.** Tumor mRNA levels of macrophage markers F4/80 (A), iNOS (B), CD206 (C), in the PyMT tumor of TAC-operated ( $n=4$ ) and non-TAC-operated (naïve) ( $n=4$ ) mice, measured using qRT-PCR, normalized to the Hsp90 housekeeping gene. The results are presented as mean  $\pm$  SEM, Student  $t$ -test. \*  $P < 0.05$ , \*\* $P < 0.01$ . Each dot represents one mouse.



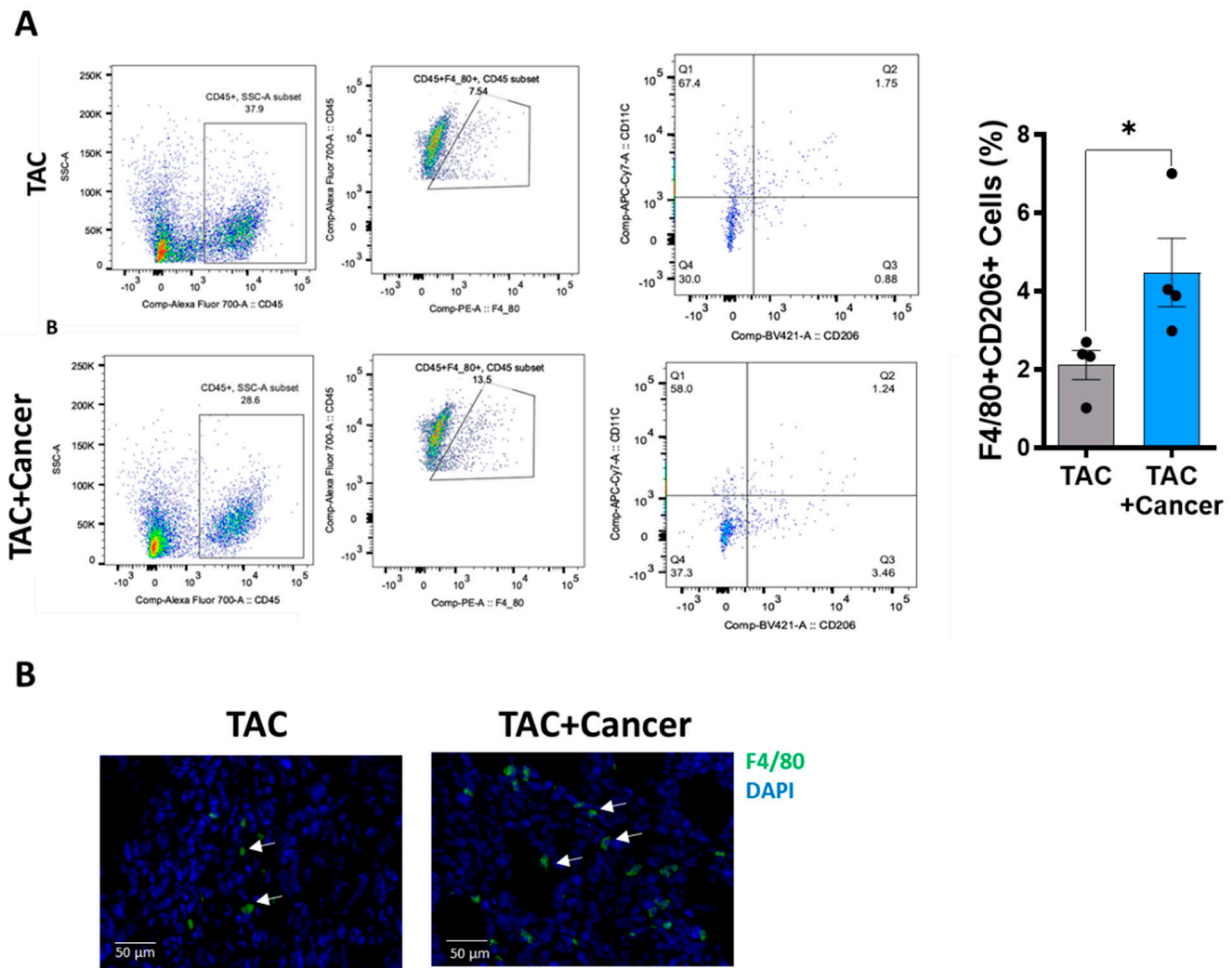

**Supplemental Figure S5: Tumor growth induces cardiac macrophage polarization**

**A.** Gating strategy (right) and CD45+F4/80+CD206+ cell count (%) (left) in TAC-operated (n=4) and TAC-operated PyMT-bearing (n=4) mice hearts using flow cytometry. Each dot represents one mouse. **B.** Representative heart sections of a TAC-operated PyMT-bearing and non-cancer-bearing mouse hearts stained with F4/80, arrows indicate to positive cells. Arrows indicate for F4/80 positive cells. The results are presented as mean  $\pm$  SEM, Student t-test. \*  $P < 0.05$ .



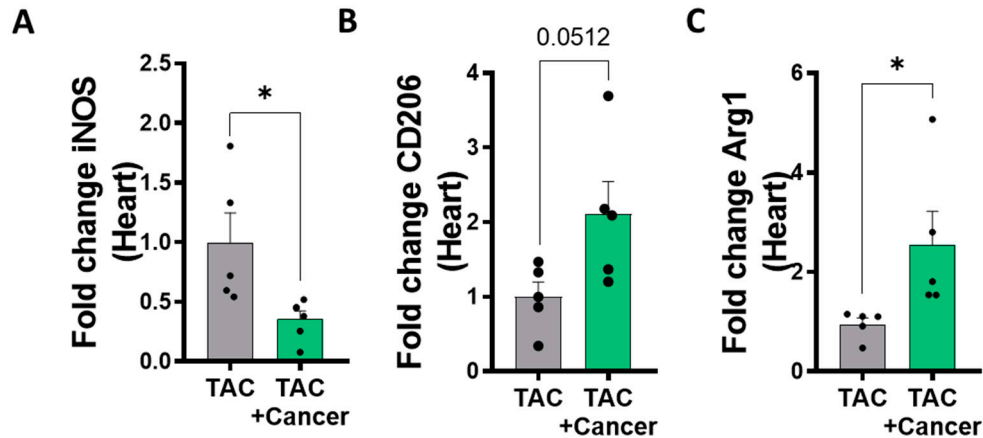

**Supplemental Figure S6: M1-to-M2 polarization in NOD-SCID mice.**

**A-C.** mRNA levels of macrophages markers iNOS (A), CD206 (B) and ARG1 (C) in the hearts of TAC-operated PyMT-bearing (n=5) and non-tumor-bearing (n=5) mice, measured using qRT-PCR, normalized to the GAPDH housekeeping gene. The results are presented as mean  $\pm$  SEM, Student t-test. \*  $P < 0.05$ . Each dot represents one mouse.

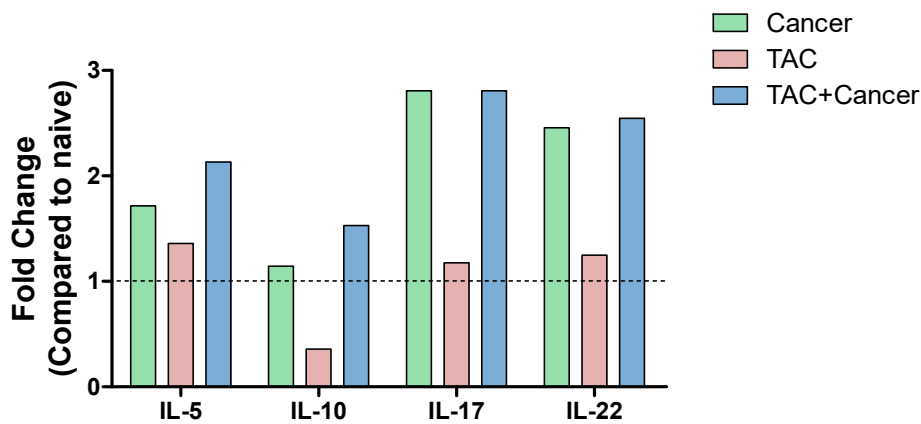

**Supplemental Figure S7: M2 polarizing cytokines are elevated in the serum of TAC-operated PyMT-bearing mice.**

Blood serum of 4 groups: naïve, PyMT bearing (Cancer), TAC-operated PyMT-bearing (TAC+cancer) and non PyMT-bearing (TAC) was used to probe cytokine array. For each cytokine, serum level is presented as fold change relative to naïve mice's blood serum. (n=4 in all groups). Dashed line indicates to 1 Fold change.



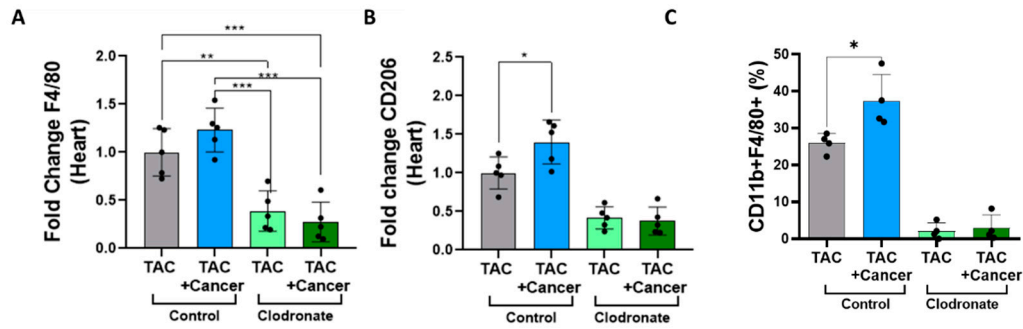

**Supplemental Figure S8: Efficiency of macrophage depletion by clodronate liposomes.**

**A-B.** Expression levels of macrophage markers F4/80 (A) and CD206 (B) in the hearts of TAC-operated PyMT-bearing and non-tumor-bearing mice, measured using qRT-PCR, normalized to the HSP90 housekeeping gene. **C.** CD11b+F4/80+ cell count in the heart of TAC-operated PyMT-bearing and non-tumor-bearing, measured using flow cytometry. The results are presented as mean  $\pm$  SEM, Student *t*-test. \*  $P < 0.05$ , \*\* $P < 0.01$ , \*\*\* $P < 0.001$ . Each dot represents one mouse. ( $n=5$  in all groups).



| Gene            | Forward                  | Reversed                  |
|-----------------|--------------------------|---------------------------|
| Hsp90           | TCGTCAGAGCTGATGATGAAGT   | GCGTTTAACCCATCCAACCTGAAT  |
| GAPDH           | TTGCCATCAACGACCCCTTCAT   | AGACTCCACGACATACTCAGCA    |
| ANP             | GCTTCCAGGCCATATTGGAG     | GGGGGCATGACCTCATCTT       |
| BNP             | GAGGTCACCTCTATCCTCTGG    | GCCATTTCTCTCCGACTTTTCTC   |
| ACTA-1          | GTGAGATTGTGCGCGACATC     | GGCAACGGAAACGCTCATT       |
| Coll $\alpha$ 1 | CTGGCGGTTTCAGGTCCAAT     | TTCCAGGCAATCCACGAGC       |
| TGF $\beta$ 3   | CCTGGCCCTGCTGAACTTG      | GACGTGGGTCATCACCGAT       |
| CTgF            | AGACCTGTGGGATGGGCAT      | GCTTGGCGATTTTAGGTGTCC     |
| $\alpha$ SMA    | GTCCCAGACATCAGGGAGTAA    | TCGGATACTTCAGCGTCAGGA     |
| F4/80           | CCCCAGTGTCTTACAGAGTG     | GTGCCCAGAGTGGATGTCT       |
| iNOS            | GACATTACGACCCCTCCAC      | GCACATGCAAGGAAGGGAAC      |
| CD206           | CTAACTGGGGTGCTGACGAG     | GGCAGTTGAGGAGGTTTCAGT     |
| Arg1            | AATGAAGAGCTGGCTGGTGT     | CTGGTTGTCAGGGGAGTGTT      |
| CD163           | CCTCCTCATTGTCTTCCTCCTGTG | CATCCGCCTTTGAATCCATCTCTTG |
| INF $\gamma$    | ACAGCAAGGCGAAAAAGGATG    | TGGTGGACCACTCGGATGA       |
| IL-13           | AACGGCAGCATGGTATGGAGTG   | TGGGTCCTGTAGATGGCATTGC    |
| CCL2            | GTGATGGAGGGGGTCAGGA      | GGGATGGGACAGCCTAAACT      |
| TNF $\alpha$    | CCCTCACACTCAGATCATCTTCT  | GCTACGACGTGGGCTACAG       |

**Supplemental Table S1: Oligonucleotides sequence**



|          | <b>TAC</b>   | <b>TAC+Cancer</b> |
|----------|--------------|-------------------|
| LVID;d-D | 4.34 ± 0.28  | 4.12 ± 0.38       |
| LVID;s-D | 3.34 ± 0.26  | 2.96 ± 0.33       |
| FS       | 23.03 ± 3.16 | 28.14 ± 2.6       |

**Supplemental Table S2: Echocardiography parameters of Figure 1B**

|          | <b>TAC</b>   | <b>TAC+TVI</b> |
|----------|--------------|----------------|
| LVID;d-D | 3.79± 0.59   | 3.72 ± 0.01    |
| LVID;s-D | 2.96 ± 0.53  | 2.64 ± 0.08    |
| FS       | 22.29 ± 1.75 | 28.98 ± 2.08   |

**Supplemental Table S3: Echocardiography parameters of Figure 3D**

|                 | <b>Control</b> |                   | <b>Clodronate</b> |                   |
|-----------------|----------------|-------------------|-------------------|-------------------|
|                 | <b>TAC</b>     | <b>TAC+Cancer</b> | <b>TAC</b>        | <b>TAC+Cancer</b> |
| <b>LVID;d-D</b> | 4.044 ± 0.36   | 3.94 ± 0.27       | 3.94 ± 0.24       | 3.93 ± 0.15       |
| <b>LVID;s-D</b> | 3.078 ± 0.27   | 2.8 ± 0.19        | 3.02 ± 0.25       | 2.96 ± 0.12       |
| <b>FS</b>       | 23.83 ± 2.63   | 28.81 ± 1.72      | 23.35 ± 3.06      | 24.55 ± 2.62      |

**Supplemental Table S4: Echocardiography parameters of Figure 5C**

|          | <b>TAC</b>  | <b>TAC+Cancer</b> |
|----------|-------------|-------------------|
| LVID;d-D | 4.29 ± 0.29 | 4.14 ± 0.24       |
| LVID;s-D | 3.42 ± 0.3  | 3.04 ± 0.21       |
| FS       | 20.36 ± 2.9 | 26.73 ± 2.74      |

**Supplemental Table S5: Echocardiography parameters of Supp. Figure 1B**

|          | <b>TAC</b>   | <b>TAC+Cancer</b> |
|----------|--------------|-------------------|
| LVID;d-D | 3.47 ± 0.33  | 3.25 ± 0.2        |
| LVID;s-D | 2.65 ± 0.28  | 2.32 ± 0.18       |
| FS       | 23.83 ± 1.22 | 28.77 ± 2.15      |

**Supplemental Table S6: Echocardiography parameters of Supp. Figure 2B**
